# Supplementary material for: Analysis of Modified Nucleotide Aptamer Library Generated by Thermophilic DNA Polymerases
Source: PubMed Central journal article supplement (PMC7689754; doi:10.1002/cbic.202000236), 2020-07-14
Supplement: CBIC-21-2939-s001.pdf [file CBIC-21-2939-s001.pdf]

# ChemBioChem

Supporting Information

## **Analysis of Modified Nucleotide Aptamer Library Generated by Thermophilic DNA Polymerases**

Krisztina Percze and Tamás Mészáros\*

**Table S1.** Oligonucleotide and primer sequences

| Name      | Sequence (5'-3')                                                                                            | Primer sequences (5'-3')                                                     |
|-----------|-------------------------------------------------------------------------------------------------------------|------------------------------------------------------------------------------|
| <b>A1</b> | ATC CAG AGT GAC GCA GCA TGT GTT ATT TTT TCC TGT<br>CCT GTC TGT TTA CGC ACT TGC CTG GAC ACG GTG GCT<br>TAG T | Forward: ATC CAG AGT GAC GCA<br>GCA , reverse: ACT AAG CCA CCG<br>TGT CCA    |
| <b>A2</b> | ATC CAG AGT GAC GCA GCA CCA GCC ACG CCA AGC CCC<br>TTC TAA CTG CTG TGAGCT CAT CTG GAC ACG GTG GCT<br>TAG T  | Forward: ATC CAG AGT GAC GCA<br>GCA , reverse: ACT AAG CCA CCG<br>TGT CCA    |
| <b>A3</b> | CAG TGA GTG ATG GTG AGG GTG AAT CGG TGT CGA CTA<br>TTA AAT TAA GTT GTG GTT GTT CCC ACA CTG TCC ATA<br>CAC G | Forward: CAG TGA GTG ATG GTG<br>AGG G, reverse: CGT GTA TGG ACA<br>GTG TGG G |

**Table S2.** Library and primer sequences

| Name           | Sequence (5'-3')                                                                              | Primer sequences (5'-3')                                                     |
|----------------|-----------------------------------------------------------------------------------------------|------------------------------------------------------------------------------|
| <b>Library</b> | ATC CAG AGT GAC GCA GCA NNN NNN NNN NNN NNN<br>NNN NNN NNN NNN NNN GAG ATA TCG TGC TAC CGT GA | Forward: ATC CAG AGT GAC GCA<br>GCA , reverse: TCA CGG TAG CAC<br>GAT ATC TC |

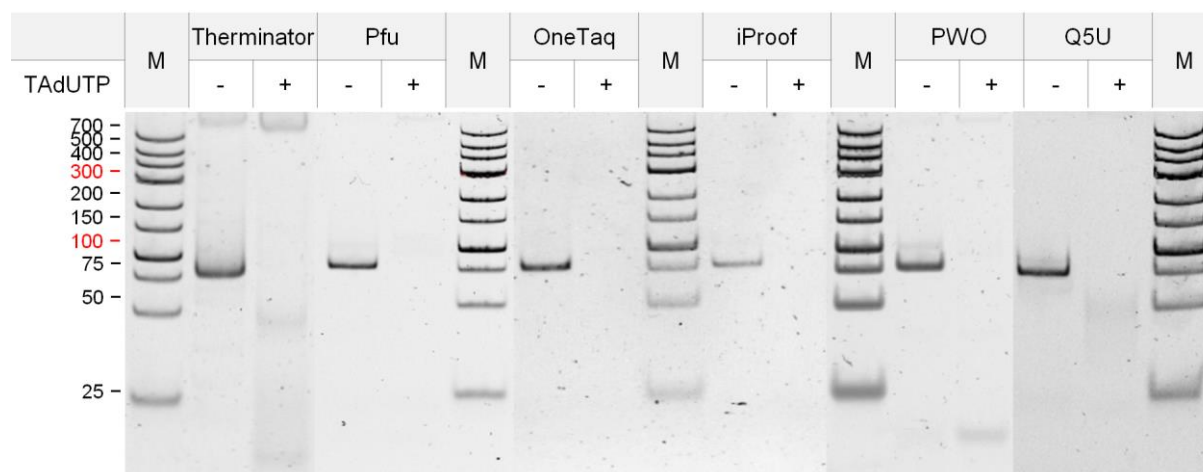**Figure S1.** 5 µl of Therminator, Pfu, OneTaq, iProof, PWO Superyield and Q5U catalyzed reaction mixtures were separated on PAGE and visualised by GelGreen dye. The mixtures either contained only natural nucleotides (-) or dTTP was replaced by TAdUTP (+).

**Table S3.** NGS data obtained by analysing PCR products amplified by Vent(exo-) or KOD XL in the presence or absence of TAdUTP

| Template                                    | A1         |          |          |          | A2         |          |          |          | A3         |          |          |          | Aptamer library |        |        |        |
|---------------------------------------------|------------|----------|----------|----------|------------|----------|----------|----------|------------|----------|----------|----------|-----------------|--------|--------|--------|
|                                             | Vent(exo-) |          | KOD XL   |          | Vent(exo-) |          | KOD XL   |          | Vent(exo-) |          | KOD XL   |          | Vent(exo-)      |        | KOD XL |        |
| Enzyme                                      | TAdUTP     |          |          |          | TAdUTP     |          |          |          | TAdUTP     |          |          |          | TAdUTP          |        |        |        |
|                                             | -          | +        | -        | +        | -          | +        | -        | +        | -          | +        | -        | +        | -               | +      | -      | +      |
| <b>Filtered reads</b>                       | 263400     | 308905   | 318252   | 759835   | 322034     | 493453   | 386921   | 195415   | 335393     | 355436   | 371264   | 354417   | 403018          | 347986 | 493867 | 210661 |
| <b>Unique reads</b>                         | 4551       | 6177     | 3118     | 14186    | 18935      | 22657    | 9695     | 6061     | 6752       | 2362     | 3520     | 3043     | 398711          | 344800 | 488725 | 208546 |
| <b>Max unique size</b>                      | 118278     | 139942   | 159783   | 368350   | 90371      | 154320   | 6735     | 76416    | 137422     | 160568   | 166054   | 159134   | 17              | 8      | 21     | 17     |
| <b>Singletons</b>                           | 3467       | 4718     | 2364     | 10899    | 13254      | 15804    | 124973   | 4212     | 5050       | 1569     | 2629     | 2123     | 394442          | 341638 | 483686 | 206480 |
| <b>Mapped to uniques (98%ID)</b>            | 260108     | 301011   | 315688   | 744850   | 296385     | 460716   | 377105   | 188327   | 327423     | 353290   | 367830   | 351445   | 8488            | 6327   | 10224  | 4312   |
| <b>Mapped reads to uniques ratio</b>        | 98.75%     | 97.44%   | 99.19%   | 98.03%   | 92.04%     | 93.37%   | 97.46%   | 96.37%   | 97.62%     | 99.40%   | 99.08%   | 99.16%   | 2.11%           | 1.82%  | 2.07%  | 2.05%  |
| <b>Abundance</b>                            | 258487     | 300086   | 315118   | 738159   | 235431     | 436797   | 285719   | 179572   | 327375     | 353246   | 367340   | 351410   | 19              | 10     | 33     | 27     |
| <b>Error rate (58bp)</b>                    | 2.98E-04   | 3.45E-04 | 1.69E-04 | 3.22E-04 | 1.01E-03   | 7.92E-04 | 4.32E-04 | 5.35E-04 | 3.53E-04   | 1.17E-04 | 1.66E-04 | 1.51E-04 |                 |        |        |        |
| <b>Unique reads to filtered reads ratio</b> |            |          |          |          |            |          |          |          |            |          |          |          | 98.93%          | 99.08% | 98.96% | 99.00% |
